# Supplementary material for: Genome-Wide Tissue-Specific Gene Expression, Co-expression and Regulation of Co-expressed Genes in Adult Nematode Ascaris suum
Source: PLoS Negl Trop Dis. 2014 Feb 6;8(2):e2678. doi: 10.1371/journal.pntd.0002678 (PMC3916258; doi:10.1371/journal.pntd.0002678)
Supplement: Table S2 — FUNC Gene Ontology (GO) enrichment significance values for genes overexpressed in each tissue studied. (XLSX) [file pntd.0002678.s005.xlsx]

## Sheet: Sheet1
	Supporting Table S2: FUNC Gene Ontology (GO) enrichment significance values for genes overexpressed in each tissue studied.
	(Use arrows in row 4 and sort A->Z to bring enriched terms to the top of the list for any given gene set)
	GO Annotation			Significant Enrichment Among Genes Overexpressed in Tissue (P value, according to FUNC, after FDR Population Correction, 0.01 threshold)
	Root	Term Name	GO Number	Head	Pharynx	Intestine	Ovary	Testis	Uterus	Seminal Vesicle	Constituitively Expressed
	molecular_function	structural constituent of ribosome	GO:0003735	-	-	-	-	-	-	-	5.41034e-55
	cellular_component	ribosome	GO:0005840	-	-	-	-	-	-	-	8.89403e-42
	biological_process	translation	GO:0006412	-	-	-	-	-	-	-	1.21378e-40
	cellular_component	small ribosomal subunit	GO:0015935	-	-	-	-	-	-	-	1.99893e-06
	biological_process	ribosome biogenesis	GO:0042254	-	-	-	-	-	-	-	3.25842e-05
	molecular_function	RNA binding	GO:0003723	-	-	-	-	-	-	-	3.97705e-05
	cellular_component	large ribosomal subunit	GO:0015934	-	-	-	-	-	-	-	6.84566e-05
	cellular_component	cytoplasm	GO:0005737	-	-	-	-	-	-	-	0.000238314
	biological_process	translational elongation	GO:0006414	-	-	-	-	-	-	-	0.000614383
	molecular_function	nucleotide binding	GO:0000166	-	-	-	-	-	-	-	0.000682404
	biological_process	actin cytoskeleton organization	GO:0030036	-	-	-	-	-	-	-	0.00103849
	molecular_function	rRNA binding	GO:0019843	-	-	-	-	-	-	-	0.00146461
	biological_process	cell redox homeostasis	GO:0045454	-	-	-	-	-	-	-	0.00157436
	molecular_function	protein transporter activity	GO:0008565	-	-	-	-	-	-	-	0.00271628
	biological_process	regulation of ARF protein signal transduction	GO:0032012	-	-	-	-	-	-	-	0.00274406
	biological_process	protein folding	GO:0006457	-	-	-	-	-	0.00274933	-	0.00280896
	biological_process	protein catabolic process	GO:0030163	-	-	-	-	-	-	-	0.00336034
	molecular_function	oxidoreductase activity, acting on NADH or NADPH	GO:0016651	-	-	-	-	-	-	-	0.00508842
	molecular_function	heat shock protein binding	GO:0031072	-	-	-	-	-	0.00225901	-	0.00965094
	molecular_function	DNA-directed RNA polymerase activity	GO:0003899	-	-	-	-	-	-	-	0.00965094
	biological_process	RNA processing	GO:0006396	-	-	-	-	-	-	-	0.00983736
	molecular_function	structural constituent of cuticle	GO:0042302	8.94691e-12	-	-	-	-	-	-	-
	cellular_component	extracellular space	GO:0005615	2.70365e-10	-	-	-	-	-	-	-
	cellular_component	integral to membrane	GO:0016021	0.00031536	0.00709687	0.000294196	-	-	-	-	-
	cellular_component	voltage-gated potassium channel complex	GO:0008076	0.000342391	-	-	-	-	-	-	-
	molecular_function	extracellular ligand-gated ion channel activity	GO:0005230	0.000525125	-	-	-	-	-	-	-
	molecular_function	hedgehog receptor activity	GO:0008158	0.000549461	-	-	-	-	-	-	-
	molecular_function	voltage-gated potassium channel activity	GO:0005249	0.000889369	-	-	-	-	-	-	-
	molecular_function	extracellular matrix structural constituent	GO:0005201	0.000898385	-	-	-	-	-	-	-
	biological_process	oxidation-reduction process	GO:0055114	0.000992629	-	-	-	-	-	-	-
	cellular_component	collagen	GO:0005581	0.0012117	-	-	-	-	-	-	-
	biological_process	potassium ion transmembrane transport	GO:0071805	0.00212623	-	-	-	-	-	-	-
	biological_process	sodium ion transport	GO:0006814	0.00287365	-	-	-	-	-	-	-
	molecular_function	potassium ion binding	GO:0030955	0.00333417	-	-	-	-	-	-	-
	molecular_function	pyruvate kinase activity	GO:0004743	0.00333417	-	-	-	-	-	-	-
	molecular_function	sodium channel activity	GO:0005272	0.00355871	-	-	-	-	-	-	-
	biological_process	potassium ion transport	GO:0006813	0.00358628	-	-	-	-	-	-	-
	cellular_component	membrane	GO:0016020	0.00578301	-	-	-	-	-	-	-
	cellular_component	extracellular matrix	GO:0031012	0.00615905	-	-	-	-	-	-	-
	molecular_function	potassium channel activity	GO:0005267	0.00622423	-	-	-	-	-	-	-
	biological_process	response to heat	GO:0009408	0.00743124	-	-	-	-	-	-	-
	molecular_function	acyl-CoA dehydrogenase activity	GO:0003995	0.00791655	-	-	-	-	-	-	-
	biological_process	ion transport	GO:0006811	0.00837281	-	-	-	-	-	-	-
	biological_process	tetrahydrofolate biosynthetic process	GO:0046654	0.00906166	-	-	-	-	-	-	-
	molecular_function	acetate-CoA ligase activity	GO:0003987	0.00932289	-	-	-	-	-	-	-
	molecular_function	AMP binding	GO:0016208	0.00932289	-	-	-	-	-	-	-
	molecular_function	arylesterase activity	GO:0004064	0.00932289	-	-	-	-	-	-	-
	molecular_function	GTP cyclohydrolase I activity	GO:0003934	0.00932289	-	-	-	-	-	-	-
	molecular_function	G-protein coupled receptor activity	GO:0004930	0.00941428	-	-	-	-	-	0.00741352	-
	molecular_function	transferase activity, transferring hexosyl groups	GO:0016758	-	7.88388e-05	0.00014006	-	-	-	-	-
	biological_process	ATP hydrolysis coupled proton transport	GO:0015991	-	9.83144e-05	7.34452e-07	-	-	-	-	-
	molecular_function	catalase activity	GO:0004096	-	0.000351893	-	-	-	-	-	-
	molecular_function	aspartic-type endopeptidase activity	GO:0004190	-	0.000766778	-	-	-	-	-	-
	molecular_function	sequence-specific DNA binding	GO:0043565	-	0.000968765	0.000399897	-	-	-	-	-
	molecular_function	cysteine-type endopeptidase activity	GO:0004197	-	0.00101823	0.000516813	-	-	-	-	-
	biological_process	cell-matrix adhesion	GO:0007160	-	0.00135117	-	-	-	-	-	-
	biological_process	metabolic process	GO:0008152	-	0.00198714	-	-	-	-	-	-
	molecular_function	sequence-specific DNA binding transcription factor activity	GO:0003700	-	0.00314918	0.00965034	-	-	-	-	-
	molecular_function	molybdenum ion binding	GO:0030151	-	0.00315809	-	-	-	-	-	-
	molecular_function	oxidoreductase activity, acting on the aldehyde or oxo group of donors, NAD or NADP as acceptor	GO:0016620	-	0.00774688	-	-	-	-	-	-
	biological_process	transmembrane transport	GO:0055085	-	-	1.27561e-07	-	-	-	-	-
	molecular_function	ATPase activity, coupled to transmembrane movement of substances	GO:0042626	-	-	1.37915e-07	-	-	-	-	-
	biological_process	proteolysis	GO:0006508	-	-	2.46475e-06	-	-	-	-	-
	molecular_function	pyridoxal phosphate binding	GO:0030170	-	-	3.54481e-06	-	-	-	-	-
	molecular_function	acid phosphatase activity	GO:0003993	-	-	1.30095e-05	-	-	-	-	-
	molecular_function	nucleoside:sodium symporter activity	GO:0005415	-	-	0.000129889	-	-	-	-	-
	molecular_function	ligand-activated sequence-specific DNA binding RNA polymerase II transcription factor activity	GO:0004879	-	-	0.000197867	-	-	-	-	-
	molecular_function	steroid hormone receptor activity	GO:0003707	-	-	0.000377928	-	-	-	-	-
	cellular_component	proton-transporting V-type ATPase, V1 domain	GO:0033180	-	-	0.000502188	-	-	-	-	-
	molecular_function	hydrolase activity, hydrolyzing O-glycosyl compounds	GO:0004553	-	-	0.000580294	-	-	-	-	-
	molecular_function	serine-type carboxypeptidase activity	GO:0004185	-	-	0.000586596	-	-	-	-	-
	molecular_function	lipid transporter activity	GO:0005319	-	-	0.000768399	-	-	-	-	-
	biological_process	steroid hormone mediated signaling pathway	GO:0043401	-	-	0.00110085	-	-	-	-	-
	molecular_function	ribokinase activity	GO:0004747	-	-	0.00121885	-	-	-	-	-
	biological_process	D-ribose metabolic process	GO:0006014	-	-	0.0016574	-	-	-	-	-
	molecular_function	carboxy-lyase activity	GO:0016831	-	-	0.00313994	-	-	-	-	-
	cellular_component	proton-transporting two-sector ATPase complex, proton-transporting domain	GO:0033177	-	-	0.00366781	-	-	-	-	-
	molecular_function	amino acid transmembrane transporter activity	GO:0015171	-	-	0.00367551	-	-	0.00584343	-	-
	biological_process	carboxylic acid metabolic process	GO:0019752	-	-	0.00431059	-	-	-	-	-
	biological_process	lipid transport	GO:0006869	-	-	0.00526583	-	-	-	-	-
	biological_process	amino acid transmembrane transport	GO:0003333	-	-	0.00575852	-	-	0.00463755	-	-
	molecular_function	transmembrane transporter activity	GO:0022857	-	-	0.00804386	-	-	-	-	-
	molecular_function	proton-transporting ATPase activity, rotational mechanism	GO:0046961	-	-	0.00853531	-	-	-	-	-
	molecular_function	serine-type peptidase activity	GO:0008236	-	-	0.00880292	-	-	-	-	-
	biological_process	sex differentiation	GO:0007548	-	-	0.00923682	-	-	-	-	-
	molecular_function	nucleic acid binding	GO:0003676	-	-	-	6.3757e-12	-	-	-	-
	molecular_function	DNA binding	GO:0003677	-	-	-	7.54063e-11	-	-	-	-
	biological_process	DNA replication	GO:0006260	-	-	-	1.87732e-10	-	-	-	-
	cellular_component	nucleus	GO:0005634	-	-	-	5.71423e-08	-	-	-	-
	biological_process	DNA repair	GO:0006281	-	-	-	2.90909e-07	-	-	-	-
	molecular_function	DNA-directed DNA polymerase activity	GO:0003887	-	-	-	1.38562e-06	-	-	-	-
	molecular_function	zinc ion binding	GO:0008270	-	-	-	4.80604e-06	-	-	-	-
	cellular_component	intracellular	GO:0005622	-	-	-	7.07251e-06	-	-	-	-
	molecular_function	ATP-dependent helicase activity	GO:0008026	-	-	-	1.79936e-05	-	-	-	-
	molecular_function	ATP-dependent DNA helicase activity	GO:0004003	-	-	-	1.81941e-05	-	-	-	-
	molecular_function	protein binding	GO:0005515	-	-	-	2.09124e-05	-	-	8.98946e-08	-
	biological_process	regulation of transcription, DNA-dependent	GO:0006355	-	-	-	2.38639e-05	-	-	-	-
	biological_process	mismatch repair	GO:0006298	-	-	-	8.54123e-05	-	-	-	-
	molecular_function	mismatched DNA binding	GO:0030983	-	-	-	0.000132648	-	-	-	-
	molecular_function	methyltransferase activity	GO:0008168	-	-	-	0.000161006	-	-	-	-
	molecular_function	helicase activity	GO:0004386	-	-	-	0.000488299	-	-	-	-
	biological_process	phosphatidylinositol phosphorylation	GO:0046854	-	-	-	0.00068676	-	-	-	-
	biological_process	phosphatidylinositol-mediated signaling	GO:0048015	-	-	-	0.00068676	-	-	-	-
	biological_process	chitin metabolic process	GO:0006030	-	-	-	0.000890055	-	-	-	-
	cellular_component	peroxisome	GO:0005777	-	-	-	0.00127696	-	-	-	-
	molecular_function	damaged DNA binding	GO:0003684	-	-	-	0.00142991	-	-	-	-
	molecular_function	chitin binding	GO:0008061	-	-	-	0.00146359	-	-	-	-
	biological_process	DNA-dependent DNA replication initiation	GO:0006270	-	-	-	0.00149687	-	-	-	-
	biological_process	mitosis	GO:0007067	-	-	-	0.00149687	-	-	-	-
	cellular_component	endomembrane system	GO:0012505	-	-	-	0.00324584	-	-	-	-
	cellular_component	transcription factor complex	GO:0005667	-	-	-	0.00464911	-	-	-	-
	biological_process	GPI anchor biosynthetic process	GO:0006506	-	-	-	0.00601993	-	-	-	-
	cellular_component	spliceosomal complex	GO:0005681	-	-	-	0.00662271	-	-	-	-
	cellular_component	transcription factor TFIID complex	GO:0005669	-	-	-	0.00662271	-	-	-	-
	molecular_function	inorganic anion exchanger activity	GO:0005452	-	-	-	0.00703052	-	-	-	-
	biological_process	cellular lipid metabolic process	GO:0044255	-	-	-	0.00914573	-	-	-	-
	molecular_function	endonuclease activity	GO:0004519	-	-	-	0.00964847	-	-	-	-
	cellular_component	nuclear part	GO:0044428	-	-	-	0.009655	-	-	-	-
	biological_process	protein phosphorylation	GO:0006468	-	-	-	-	8.08584e-36	-	-	-
	biological_process	protein dephosphorylation	GO:0006470	-	-	-	-	2.46981e-25	-	-	-
	molecular_function	protein tyrosine phosphatase activity	GO:0004725	-	-	-	-	2.2097e-24	-	-	-
	molecular_function	protein serine/threonine kinase activity	GO:0004674	-	-	-	-	8.69266e-24	-	-	-
	molecular_function	ATP binding	GO:0005524	-	-	-	-	6.80141e-14	-	-	-
	molecular_function	protein tyrosine kinase activity	GO:0004713	-	-	-	-	2.64698e-12	-	-	-
	molecular_function	protein kinase activity	GO:0004672	-	-	-	-	1.44991e-08	-	-	-
	biological_process	ubiquitin-dependent protein catabolic process	GO:0006511	-	-	-	-	0.000242109	-	-	-
	molecular_function	phosphoenolpyruvate carboxykinase activity	GO:0004611	-	-	-	-	0.000290908	-	-	-
	biological_process	gluconeogenesis	GO:0006094	-	-	-	-	0.000363	-	-	-
	cellular_component	cullin-RING ubiquitin ligase complex	GO:0031461	-	-	-	-	0.000422763	-	-	-
	molecular_function	cytochrome-c oxidase activity	GO:0004129	-	-	-	-	0.00113755	-	-	-
	biological_process	glycerol metabolic process	GO:0006071	-	-	-	-	0.00253247	-	-	-
	biological_process	glycerol-3-phosphate metabolic process	GO:0006072	-	-	-	-	0.00253247	-	-	-
	molecular_function	transferase activity, transferring nitrogenous groups	GO:0016769	-	-	-	-	0.0026484	-	-	-
	molecular_function	ubiquitin protein ligase binding	GO:0031625	-	-	-	-	0.00266388	-	-	-
	biological_process	tricarboxylic acid cycle	GO:0006099	-	-	-	-	0.00280761	-	-	-
	biological_process	regulation of cyclin-dependent protein kinase activity	GO:0000079	-	-	-	-	0.00649672	-	-	-
	molecular_function	protein kinase binding	GO:0019901	-	-	-	-	0.00926041	-	-	-
	cellular_component	glycerol-3-phosphate dehydrogenase complex	GO:0009331	-	-	-	-	0.00999026	-	-	-
	cellular_component	respiratory chain	GO:0070469	-	-	-	-	0.00999026	-	-	-
	cellular_component	endoplasmic reticulum	GO:0005783	-	-	-	-	-	6.87189e-05	-	-
	biological_process	glycerol ether metabolic process	GO:0006662	-	-	-	-	-	0.000106693	-	-
	biological_process	tRNA aminoacylation for protein translation	GO:0006418	-	-	-	-	-	0.000113591	-	-
	molecular_function	aminoacyl-tRNA ligase activity	GO:0004812	-	-	-	-	-	0.000215286	-	-
	molecular_function	dolichyl-diphosphooligosaccharide-protein glycotransferase activity	GO:0004579	-	-	-	-	-	0.00167261	-	-
	molecular_function	phosphatidylinositol phosphate kinase activity	GO:0016307	-	-	-	-	-	0.00167261	-	-
	molecular_function	calcium-transporting ATPase activity	GO:0005388	-	-	-	-	-	0.00243697	-	-
	biological_process	signal peptide processing	GO:0006465	-	-	-	-	-	0.0052349	-	-
	molecular_function	SNAP receptor activity	GO:0005484	-	-	-	-	-	0.00609607	-	-
	molecular_function	protein disulfide oxidoreductase activity	GO:0015035	-	-	-	-	-	0.00651684	-	-
	molecular_function	unfolded protein binding	GO:0051082	-	-	-	-	-	0.00791439	-	-
	biological_process	intracellular protein transport	GO:0006886	-	-	-	-	-	0.00994465	-	-
	biological_process	protein glycosylation	GO:0006486	-	-	-	-	-	0.00996715	-	-
	molecular_function	actin binding	GO:0003779	-	-	-	-	-	-	0.0004703	-
	molecular_function	fucosyltransferase activity	GO:0008417	-	-	-	-	-	-	0.000734341	-
	biological_process	signal transduction	GO:0007165	-	-	-	-	-	-	0.00102737	-
	cellular_component	synaptic vesicle	GO:0008021	-	-	-	-	-	-	0.00169567	-
	biological_process	regulation of Rab GTPase activity	GO:0032313	-	-	-	-	-	-	0.0019766	-
	biological_process	protein transport	GO:0015031	-	-	-	-	-	-	0.0023314	-
	molecular_function	Rab GTPase activator activity	GO:0005097	-	-	-	-	-	-	0.00272718	-
	molecular_function	inward rectifier potassium channel activity	GO:0005242	-	-	-	-	-	-	0.00377854	-
	biological_process	vesicle-mediated transport	GO:0016192	-	-	-	-	-	-	0.00647788	-
	molecular_function	L-ascorbic acid binding	GO:0031418	-	-	-	-	-	-	0.00672196	-
	biological_process	multicellular organismal development	GO:0007275	-	-	-	-	-	-	0.00768667	-
